# Supplementary material for: Microridge-like structures anchor motile cilia
Source: PubMed Central journal article supplement (PMC9018822; doi:10.1038/s41467-022-29741-3), 2022-04-19
Supplement: 41467_2022_29741_MOESM3_ESM.pdf [file 41467_2022_29741_MOESM3_ESM.pdf]

## **DESCRIPTION OF ADDITIONAL SUPPLEMENTARY FILES**

File Name: Supplementary Movie 1

**3D reconstruction of cilia at stage 20-21 and stage 30, analyzed by transmission electron microscopy.**

File Name: Supplementary Movie 2

**Workflow, describing the analyses of cilia by transmission electron microscopy and 3 D reconstruction**
